# Supplementary material for: In Silico Screening of the Key Cellular Remodeling Targets in Chronic Atrial Fibrillation
Source: PubMed Central journal article supplement (PMC4031057; doi:10.1371/journal.pcbi.1003620), 2014-05-22
Supplement: pcbi.1003620.s013.pdf [file pcbi.1003620.s013.pdf]

|           | LA/LV | LA    | LV   | LA/LV | Supporting Reference |
|-----------|-------|-------|------|-------|----------------------|
| SERCA     | 1.33  |       |      |       | [32]                 |
|           | 1.70  |       |      |       | [33]                 |
| PLB       | 0.525 |       |      |       | [32]                 |
|           | 0.706 |       |      |       | [33]                 |
| PLB/SERCA |       | 1.06  | 2.71 | 0.39  | [32]                 |
|           |       | 0.877 | 2.12 | 0.41  | [33]                 |
