# Supplementary material for: In Silico Screening of the Key Cellular Remodeling Targets in Chronic Atrial Fibrillation
Source: PubMed Central journal article supplement (PMC4031057; doi:10.1371/journal.pcbi.1003620), 2014-05-22
Supplement: pcbi.1003620.s014.pdf [file pcbi.1003620.s014.pdf]

| Current                             | Change (%) | Mean (%)   | Supporting Reference |
|-------------------------------------|------------|------------|----------------------|
| I <sub>CaL</sub>                    | -73        |            | [34]                 |
|                                     | -63        |            | [35]                 |
|                                     | -56        |            | [36]                 |
|                                     | -64        |            | [37]                 |
|                                     | -50        |            | [38]                 |
|                                     | -64        |            | [39]                 |
|                                     | -51        |            | [40]                 |
|                                     | -54        |            | [24]                 |
|                                     |            | <b>-59</b> |                      |
| I <sub>to</sub>                     | -66        |            | [41]                 |
|                                     | -84        |            | [34]                 |
|                                     | -44        |            | [42]                 |
|                                     | -83        |            | [43]                 |
|                                     | -65        |            | [37]                 |
|                                     | -49        |            | [44]                 |
|                                     | -44        |            | [19]                 |
|                                     |            | <b>-62</b> |                      |
| I <sub>K1</sub>                     | -8.6       |            | [33]                 |
|                                     | +102       |            | [20]                 |
|                                     | +106       |            | [45] #               |
|                                     | +73        |            | [46]                 |
|                                     | +44        |            | [37] *               |
|                                     | +7.2       |            | [47]                 |
|                                     | +75        |            | [48]                 |
|                                     | +96        |            | [39]                 |
|                                     |            | <b>+62</b> |                      |
| I <sub>sus</sub> / I <sub>Kur</sub> | -44        |            | [41]                 |
|                                     | (-25)      |            | [34]                 |
|                                     | -55        |            | [42]                 |
|                                     | (-24)      |            | [43]                 |
|                                     | -22        |            | [44]                 |
|                                     | -60        |            | [19]                 |
|                                     |            | <b>-38</b> |                      |
