# Supplementary material for: In Silico Screening of the Key Cellular Remodeling Targets in Chronic Atrial Fibrillation
Source: PubMed Central journal article supplement (PMC4031057; doi:10.1371/journal.pcbi.1003620), 2014-05-22
Supplement: pcbi.1003620.s016.pdf [file pcbi.1003620.s016.pdf]

| nSR            | cAF             | cAF / nSR | Supporting Reference |
|----------------|-----------------|-----------|----------------------|
| $72.1 \pm 3.0$ | $76.6 \pm 4.8$  | 1.06      | [34]                 |
| $67.6 \pm 2.9$ | $90.4 \pm 8.3$  | 1.33      | [35]                 |
| $92 \pm 12$    | $157 \pm 14$    | 1.71      | [45]                 |
| $90 \pm 5$     | $112 \pm 7$     | 1.24      | [36]                 |
| $84 \pm 4$     | $139 \pm 11$    | 1.65      | [46]                 |
| $98.3 \pm 6.4$ | $107.3 \pm 5.8$ | 1.09      | [47]                 |
| $88.1 \pm 1.9$ | $106.1 \pm 3.8$ | 1.20      | [38]                 |
| $89.4 \pm 8.8$ | $112.1 \pm 9.4$ | 1.25      | [39]                 |
| $78 \pm 1$     | $92 \pm 2$      | 1.18      | [51]                 |
| $65 \pm 4.2$   | $89 \pm 5.2$    | 1.37      | [40]                 |
| $70.8 \pm 4.4$ | $85.5 \pm 6.1$  | 1.21      | [44]                 |
| $72.3 \pm 5.4$ | $96.6 \pm 7.7$  | 1.34      | [19]                 |
